# Supplementary material for: Efficient visible-light-driven photocatalytic hydrogen production over a direct Z-scheme system of TaON/Cd0.5Zn0.5S with a NiS cocatalyst
Source: Royal Society of Chemistry journal article supplement (doi:10.1039/c9pp00427k), 2019-12-13
Supplement: c9pp00427k1.pdf [file c9pp00427k1.pdf]

## Supporting Information

### Efficient visible-light-driven photocatalytic hydrogen production over direct Z-scheme system TaON/Zn<sub>0.5</sub>Cd<sub>0.5</sub>S with NiS cocatalyst

Tingting Wei,<sup>a</sup>Zhanbin Jin,<sup>a</sup>Fengyan Li,<sup>\*a</sup>Dandan Yan,<sup>a</sup> and Lin Xu<sup>\*a</sup>

<sup>a</sup> Key Laboratory of Polyoxometalates Science of Ministry of Education, College of Chemistry, Northeast Normal University, Changchun 130024, P. R. China.

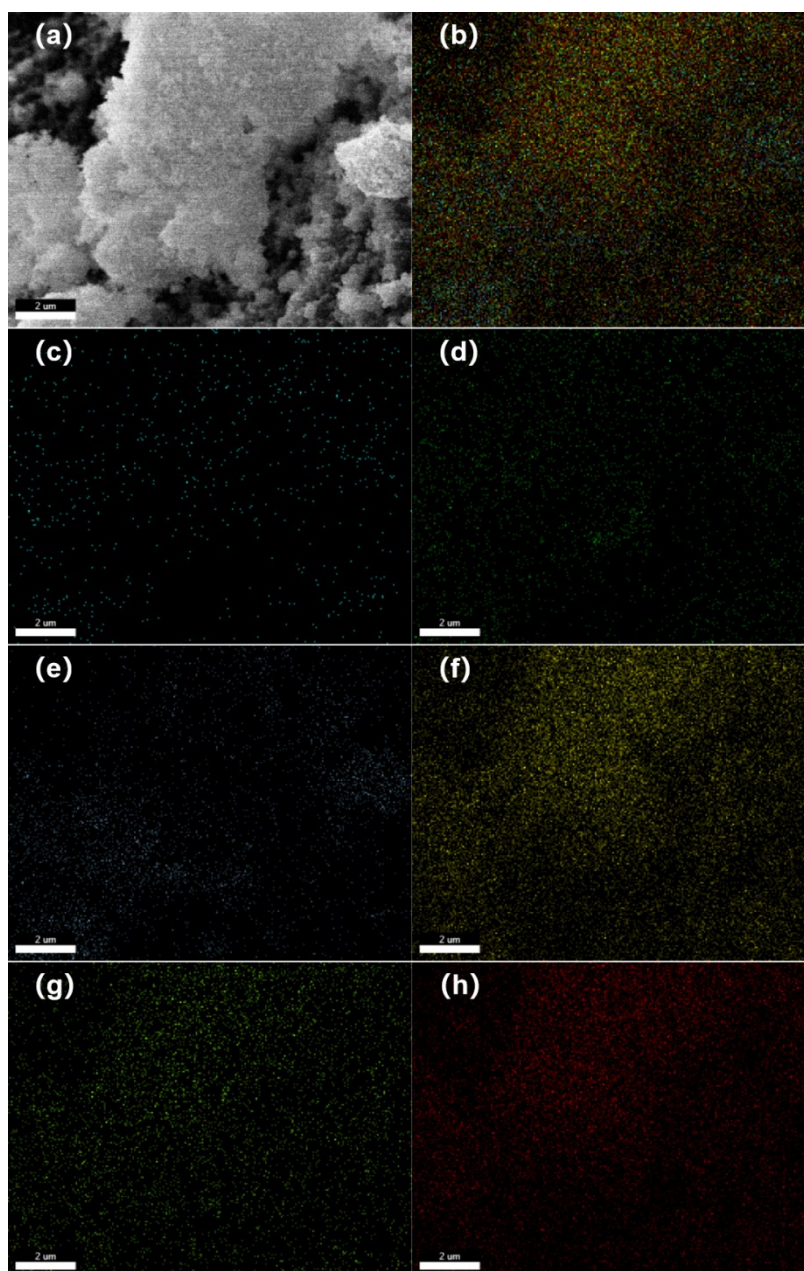

**Fig. S1.** SEM image (a) and the overlay image (b) of T30-ZCS; the corresponding SEM mapping images of (c) N (d) O (e) Ta (f) Zn (h)Cd (i) S.

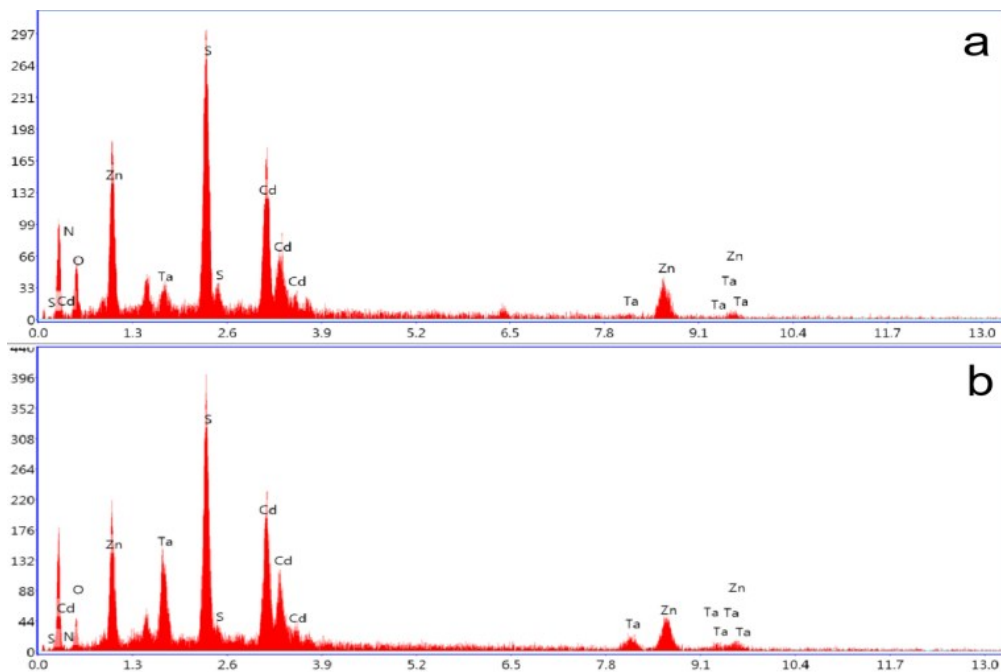

**Fig. S2.** EDS spectrum of (a) T4-ZCS and (b) T30-ZCS.

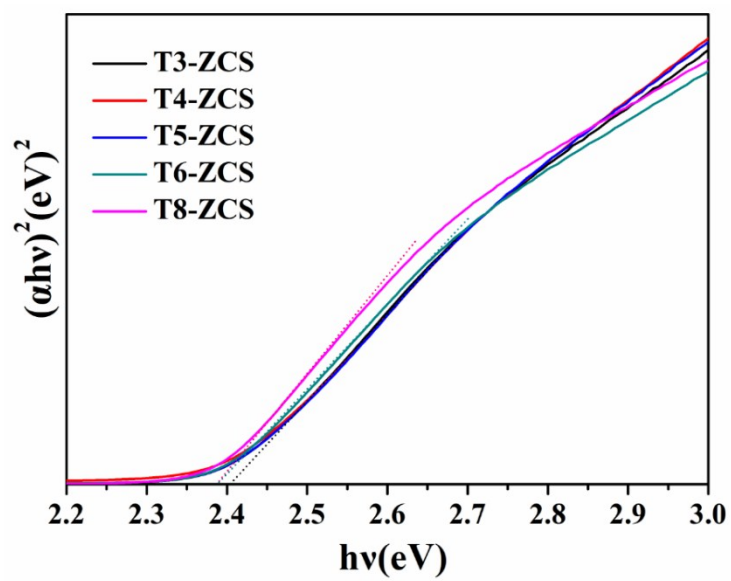

**Fig. S3** The plots of  $(\alpha h\nu)^2$  versus  $h\nu$  of the TaON-ZCS photocatalysts.

**Table S1.** Surface area and pore size parameters for ZCS, TaON and T4-ZCS.

| Sample | BET(m <sup>2</sup> /g) | BJH pore size (nm) |
|--------|------------------------|--------------------|
| ZCS    | 49.2493                | 19.60              |
| TaON   | 4.9273                 | 10.59              |
| T4-ZCS | 38.3013                | 18.99              |

**Table S2.** Typical earth-abundant NiS co-catalysts and other systems consisted of NiS-MoS<sub>2</sub>, CoP and Co<sub>3</sub>N co-catalysts for photocatalytic hydrogen evolution.

| Photocatalyst                                                               | Amount of catalyst (mg) | Activity (the value reported in literature) | Activity ( $\times 1000 \mu\text{mol h}^{-1} \text{g}^{-1}$ ) | A.Q.Y. (%) | Reference |
|-----------------------------------------------------------------------------|-------------------------|---------------------------------------------|---------------------------------------------------------------|------------|-----------|
| NiS/TaON-Zn <sub>0.5</sub> Cd <sub>0.5</sub> S                              | 50                      | 1740 $\mu\text{mol} \cdot \text{h}^{-1}$    | 34.8                                                          | 25.5       | This work |
| NiS/Zn <sub>x</sub> Cd <sub>1-x</sub> S-MOF                                 | 50                      | 839 $\mu\text{mol} \cdot \text{h}^{-1}$     | 16.78                                                         | ---        | 1         |
| 1T-1Li <sub>x</sub> MoS <sub>2</sub> /Cd <sub>0.5</sub> Zn <sub>0.5</sub> S | 100                     | 769.9 $\mu\text{mol} \cdot \text{h}^{-1}$   | 7.699                                                         | ---        | 2         |
| NiS/g-C <sub>3</sub> N <sub>4</sub> -SrTiO <sub>3</sub>                     | 50                      | 86.13 $\mu\text{mol} \cdot \text{h}^{-1}$   | 1.7227                                                        | ---        | 3         |
| NiS-MoS <sub>2</sub> /CNTs/CN                                               | 20                      | 6.198 $\mu\text{mol} \cdot \text{h}^{-1}$   | 0.3099                                                        | ---        | 4         |
| NiS <sub>x</sub> /Zn <sub>0.8</sub> Cd <sub>0.2</sub> S/rGO                 | 50                      | 392 $\mu\text{mol} \cdot \text{h}^{-1}$     | 7.84                                                          | 20.88      | 5         |
| Zn <sub>0.5</sub> Cd <sub>0.5</sub> S/CoP                                   | 50                      | 734 $\mu\text{mol} \cdot \text{h}^{-1}$     | 14.68                                                         | ---        | 6         |
| Co <sub>3</sub> N/ CdS                                                      | 1                       | 137.3 $\mu\text{mol} \cdot \text{h}^{-1}$   | 137.33                                                        | 14.9       | 7         |
| CdS nanorod/CoP                                                             | 1                       | 500 $\mu\text{mol} \cdot \text{h}^{-1}$     | 500                                                           | 35         | 8         |
| CdS/CoP                                                                     | 1                       | 254 $\mu\text{mol} \cdot \text{h}^{-1}$     | 254                                                           | 25.1       | 9         |

## References

1. X. X. Zhao, J.R. Feng, J. Liu, W. Shi, G. M. Yang, G. C. Wang and P. Cheng, *Angew. Chem. Int. Ed.*, 2018, **57**, 9790-9794.

2. H. Du, H. L. Guo, Y. N. Liu, X. Xie, K. Liang, X. Zhou, X. Wang and A. W. Xu, *ACS Appl. Mater. Inter.*, 2016, **8**, 4023-4030.
3. X. L. Luo, G. L. He, Y. P. Fang, Y. H. Xu, *J. Colloid Interfaces Sci.*, 2018, **518**, 184–191.
4. Y. X. Zhang, K. Li, Y. X. Yu, W. D. Zhang, *J. Colloid Interfaces Sci.*, 2018, **526**, 374–383.
5. C. Xue, H. Li, H. An, B. L. Yang, J. J. Wei and G. D. Yang, *ACS Catal.*, 2018, **8**, 1532-1545.
6. D.S. Dai, H. Xu, L. Ge., C.c. Han, Y.Q. Gao, S.S. Li and Y Lu, *Appl. Catal. B*, 2017, **217**, 429-436.
7. H.L. Chen, D.C. Jiang, Z. J. Sun, R. M. Irfan, L. Zhang and P. W Du, *Catal. Sci. Technol.*, 2017, **7**, 1515-1522.
8. Z. J. Sun, B. H. Lv, J. S. Li, M. Xiao, X. Y. Wang and P. W. Du, *J. Mater. Chem. A*, 2016, **4**, 1598.
9. S. Cao, Y. Chen, C. J. Wang, X. J. Lv and W. F. Fu, *Chem. Commun.*, 2015, **51**, 8708.
